# Supplementary material
Source: PubMed Central journal article supplement (PMC1691410)
Supplement: 12908973s01.pdf [file 12908973s01.pdf]

This is an electronic appendix to the paper by Doblhammer & Oeppen 2003 Reproduction and longevity among the British peerae: the effect of frailty and health selection. *Proc. R. Soc. Lond. B* 270, 1541--1547. (DOI 10.1098/rspb.2003.2400.)

Electronic appendices are refereed with the text. However, no attempt is made to impose a uniform editorial style on the electronic appendices.

Electronic Appendix A. Table 2: Reproductive characteristics of the peers with the highest accuracy in the dates of their vital events.

| Birth cohort   | All parities               |             |            |                         |                        |                      | Parities 2+ |       |
|----------------|----------------------------|-------------|------------|-------------------------|------------------------|----------------------|-------------|-------|
|                | Average number of children | % childless | % parity 1 | Max. number of children | % child at age >40/<20 | Average marriage age | Total       | Total |
| <b>Females</b> |                            |             |            |                         |                        |                      |             |       |
| ≤ 1650         | 5.9                        | 15.9        | 4.9        | 15                      | 32.9/52.4              | 20.8                 | 82          | 65    |
| 1651-1675      | 5.5                        | 17.1        | 4.9        | 23                      | 17.1/58.5              | 20.2                 | 41          | 32    |
| 1676-1700      | 5.4                        | 7.7         | 9.2        | 16                      | 32.3/33.8              | 24.0                 | 65          | 54    |
| 1701-1725      | 4.2                        | 20.8        | 7.8        | 16                      | 31.2/31.2              | 24.4                 | 77          | 55    |
| 1726-1750      | 4.6                        | 22.6        | 9.7        | 14                      | 34.4/36.6              | 25.3                 | 93          | 63    |
| 1751-1775      | 5.4                        | 14.5        | 8.9        | 18                      | 40.7/28.0              | 24.1                 | 214         | 164   |
| 1776-1800      | 5.1                        | 16.0        | 7.8        | 16                      | 33.5/24.1              | 25.8                 | 319         | 243   |
| 1801-1825      | 5.0                        | 16.9        | 8.1        | 16                      | 35.5/23.9              | 25.4                 | 431         | 323   |
| 1826-1850      | 4.2                        | 20.9        | 7.1        | 15                      | 25.2/27.3              | 25.6                 | 532         | 383   |
| <b>Total</b>   | 4.84                       | 17.7        | 7.8        | 23                      | 31.9/28.7              | 25.0                 | 1854        | 1382  |
| <b>Males</b>   |                            |             |            |                         |                        |                      |             |       |
| ≤ 1650         | 6.1                        | 11.1        | 8.7        | 19                      | 50.0/19.0              | 25.4                 | 126         | 101   |
| 1651-1675      | 5.1                        | 14.8        | 14.8       | 17                      | 38.9/18.5              | 27.3                 | 54          | 38    |
| 1676-1700      | 4.4                        | 17.4        | 10.9       | 16                      | 37.0/15.2              | 27.2                 | 92          | 66    |
| 1701-1725      | 4.3                        | 20.1        | 8.6        | 18                      | 50.4/20.1              | 30.5                 | 139         | 99    |
| 1726-1750      | 5.2                        | 17.8        | 4.5        | 16                      | 55.4/18.5              | 29.8                 | 157         | 122   |
| 1751-1775      | 5.7                        | 18.6        | 3.2        | 16                      | 56.1/18.9              | 30.5                 | 280         | 219   |
| 1776-1800      | 5.6                        | 16.1        | 5.0        | 16                      | 56.8/16.1              | 29.5                 | 380         | 300   |
| 1801-1825      | 4.9                        | 16.5        | 6.0        | 15                      | 55.9/15.6              | 30.6                 | 449         | 348   |
| 1826-1850      | 4.2                        | 17.1        | 6.1        | 15                      | 50.7/16.8              | 30.6                 | 525         | 403   |
| <b>Total</b>   | 5.00                       | 16.8        | 6.1        | 17                      | 52.9/17.1              | 29.8                 | 2202        | 1696  |
